# Supplementary material
Source: Research Square preprint supplement (doi:10.21203/rs.3.rs-8544453/v1)
Supplement: Supplementary file 1 [file 831c69fa86cd5fdb12010faf.pdf]

# **Maslach Burnout Inventory™**

## **MBI Forms and Scoring Keys:**

**Human Services - MBI-HSS**

**Medical Personnel - MBI-HSS (MP)**

**Educators - MBI-ES**

**General - MBI-GS**

**Students - MBI-GS (S)**

## **License to Administer**

By Christina Maslach, Susan E. Jackson, Michael P. Leiter,  
Wilmar B. Schaufeli & Richard L. Schwab

Published by Mind Garden, Inc.  
[www.mindgarden.com](http://www.mindgarden.com)

## **Important Note to Licensee**

It is your legal responsibility to compensate the copyright holder of this work — via payment to Mind Garden — for reproduction or administration in any physical or digital medium, including online survey, handheld survey devices, etc.

You agree to track the number of reproductions or administrations, and to compensate Mind Garden for any usage in excess of the quantity purchased.

This license is valid for three years from the date of purchase.

This instrument, and any use thereof, is covered by U.S. and international copyright laws. For any further use or reproduction of the instrument, in whole or in part, contact Mind Garden, Inc.

**MBI-Human Services Survey:** Copyright ©1981 Christina Maslach & Susan E. Jackson.

**MBI-Human Services Survey for Medical Personnel:** Copyright ©1981, 2016 Christina Maslach & Susan E. Jackson.

**MBI-Educators Survey:** Copyright ©1986 Christina Maslach, Susan E. Jackson & Richard L. Schwab.

**MBI-General Survey:** Copyright ©1996 Wilmar B. Schaufeli, Michael P. Leiter, Christina Maslach & Susan E. Jackson.

**MBI-General Survey for Students:** Copyright ©1996, 2016 Wilmar B. Schaufeli, Michael P. Leiter, Christina Maslach & Susan E. Jackson.

All rights reserved in all media. Published by Mind Garden, Inc., [www.mindgarden.com](http://www.mindgarden.com)
